# Supplementary material
Source: HighWire-hosted journal article supplement (https://gh.bmj.com/content/3/5/e000854)

**Appendix 1. Eight focus group discussions (FGDs) for four subpopulations**

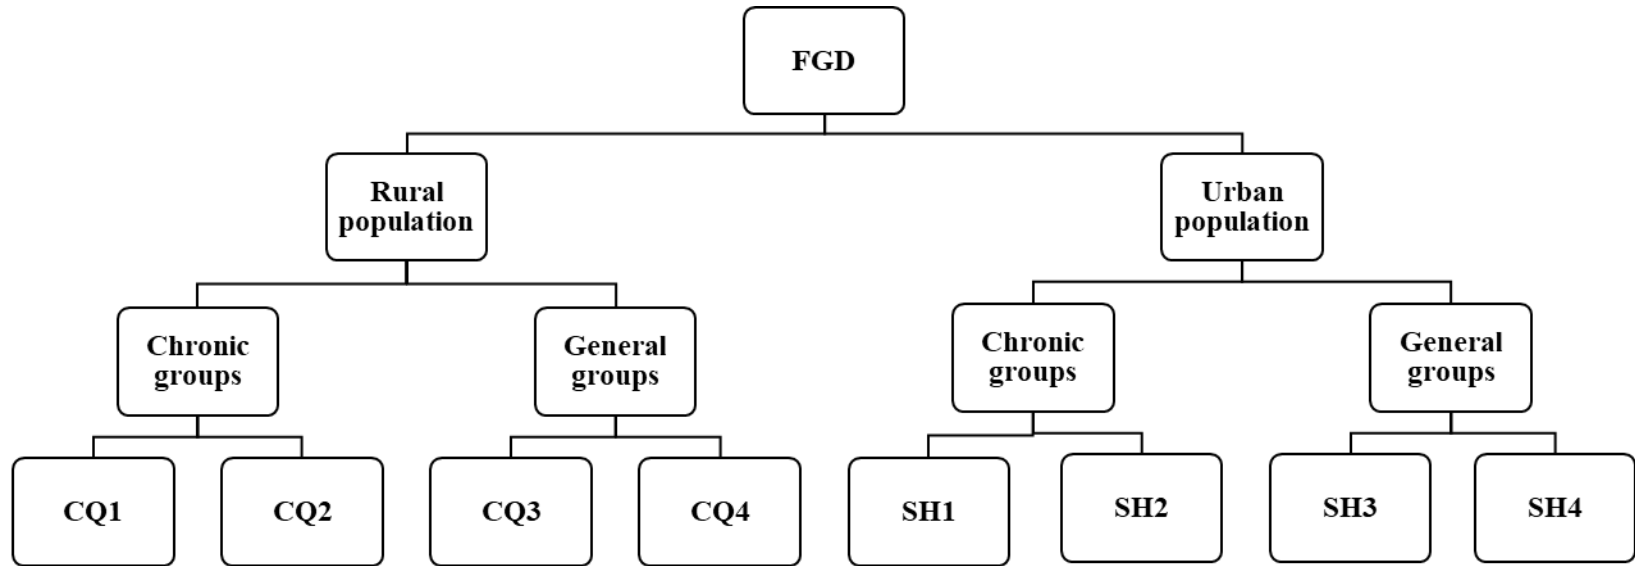

Supplement: inline-supplementary-material-1 [file inline-supplementary-material-1.pdf]
